# Supplementary material
Source: MDPI journal article supplement (https://www.mdpi.com/2297-8739/9/2/41)
Supplement: s1 [file s1]

Supplementary Materials

# Two New Fumarprotocetraric Acid Lactones Identified and Characterized by UHPLC-PDA/ESI/ORBITRAP/MS/MS from the Antarctic Lichen *Cladonia Metacorallifera*

Beatriz Sepúlveda <sup>1</sup>, Alberto Cornejo <sup>2</sup>, Daniela Bárcenas-Pérez <sup>3,4</sup>, José Cheel <sup>3</sup> and Carlos Areche <sup>5,\*</sup>

<sup>1</sup> Departamento de Ciencias Químicas, Campus Viña del Mar, Universidad Andrés Bello, Quillota 980, Viña del Mar 2520000, Chile; bsepulveda@uc.cl

<sup>2</sup> Facultad de Medicina, Escuela de Tecnología Médica, Universidad Andrés Bello, Sazié 2315, Primer Piso, Santiago 8370092, Chile; alberto.cornejo@unab.cl

<sup>3</sup> Laboratory of Algal Biotechnology—Centre ALGATECH, Institute of Microbiology of the Czech Academy of Sciences, Opatovický Mlyn, 379 81 Trebon, Czech Republic; barcnas@alga.cz (D.B.-P.); jcheel@alga.cz (J.C.)

<sup>4</sup> Faculty of Science, University of South Bohemia, Branisovska 1760, 370 05 Ceske Budejovice, Czech Republic

<sup>5</sup> Departamento de Química, Facultad de Ciencias, Universidad de Chile, Santiago 8320000, Chile

\* Correspondence: areche@uchile.cl; Tel.: +56-2-9787218

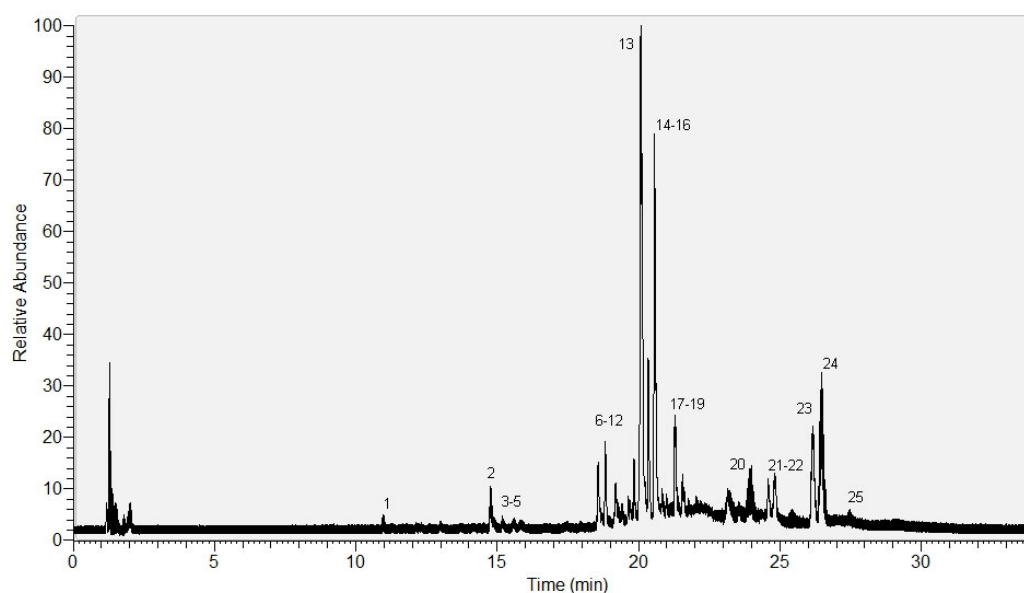

**Figure S1.** UHPLC-ESI-MS-MS Chromatogram of methanolic extract of *C. metacorallifera*.

## Name of compounds identified from *C. metacorallifera*

1. Orsellinic acid
2. Ethyl 4-carboxyorskellinate

3. Squamatic acid
4. Psoromic acid isomer
5. Hydroxy fumarprotocetraric acid lactone
6. Connorstictic acid
7. Fumarprotocetraric acid lactone
8. Siphulellic acid
9. Lecanoric acid
10. Succinprotocetraric acid
11. Pentahydroxytetracosanoic acid
12. Tetrahydroxydocosanoic acid
13. Fumarprotocetraric acid
14. Tetrahydroxytricosanoic acid
15. Cryptostictic acid
16. 6-ethyl-6-n-pentylpentadecan-4,5,7,8,15-pentol-15-acetate
17. Thamnic acid
18. Gyrophoric acid
19. Psoromic acid
20. Dihydroxyoxodocosanoic acid
21. Lobaric acid
22. Ethyl-4-O-methylolivetolcarboxylate
23. Usnic acid
24. Atranorin
25. Dihydroxyheptadecatrienoic acid
